# Supplementary material
Source: HighWire-hosted journal article supplement (http://www.jrheum.org/highwire/filestream/29820/field_highwire_adjunct_files/0/160347DataSuppl.pdf)
Supplement: 160347DataSuppl.pdf [file 160347DataSuppl.pdf]

**Supplementary Data 1.** General characteristics of the AS genetic risk score (AS-GRS) construction and validation sets.

| Parameter      | AS-GRS construction set |                  | Independent validation set |                  |
|----------------|-------------------------|------------------|----------------------------|------------------|
|                | AS patients (n=285)     | Controls (n=363) | AS patients (n=576)        | Controls (n=680) |
| <b>Age*</b>    |                         |                  |                            |                  |
| Average        | 23.4±8.6                | 32.4±10.3        | 28.7±11.5                  | 24.3±14.7        |
| Median         | 22 (5-62)               | 29 (20-74)       | 26 (8-82)                  | 23 (10-80)       |
| <b>Gender</b>  |                         |                  |                            |                  |
| Male           | 254 (89.1%)             | 286 (78.8%)      | 494 (85.8%)                | 578 (85.0%)      |
| Female         | 31 (10.9%)              | 77 (21.2%)       | 82 (14.2%)                 | 102 (15.0%)      |
| <b>HLA-B27</b> |                         |                  |                            |                  |
| Positive       | 273 (95.8%)             | 24 (6.6%)        | 535 (92.9%)                | 56 (8.2%)        |
| Negative       | 12 (4.2%)               | 339 (93.4%)      | 41 (7.1%)                  | 624 (91.8%)      |

\* The age at diagnosis was used for cases and the age at recruitment was used for controls.

**Supplementary Data 2.** Validation of TaqMan CNV assays.

| 1q32.2<br>Accuracy = 97.3% |          | Deletion-typing PCR |      |
|----------------------------|----------|---------------------|------|
|                            |          | Deletion            | ≥ 2N |
| TaqMan<br>CNV assay        | Deletion | 227                 | 7    |
|                            | ≥ 2N     | 7                   | 282  |

| 13q13.1<br>Accuracy = 99.8% |          | Deletion-typing PCR |      |
|-----------------------------|----------|---------------------|------|
|                             |          | Deletion            | ≥ 2N |
| TaqMan<br>CNV assay         | Deletion | 217                 | 0    |
|                             | ≥ 2N     | 1                   | 304  |

**Supplementary Data 3.** Frequency distributions of genetic markers.

| Genetic marker<br>(risk event) | AS-GRS construction set |         |                  |         | Independent validation set |         |                  |         |
|--------------------------------|-------------------------|---------|------------------|---------|----------------------------|---------|------------------|---------|
|                                | AS patients (n=285)     |         | Controls (n=363) |         | AS patients (n=576)        |         | Controls (n=680) |         |
|                                | Risk                    | No risk | Risk             | No risk | Risk                       | No risk | Risk             | No risk |
| 1q32.2 (deletion)              | 179                     | 106     | 107              | 256     | 338                        | 238     | 308              | 372     |
| 2q31.2 (deletion)              | 185                     | 100     | 138              | 225     | -                          | -       | -                | -       |
| 13q13.1 (deletion)             | 161                     | 124     | 88               | 275     | 303                        | 273     | 236              | 444     |
| 16p13.3 (deletion)             | 38                      | 247     | 17               | 346     | 51                         | 525     | 32               | 648     |
| rs10865331 (A)                 | 222                     | 63      | 182              | 181     | 402                        | 174     | 388              | 292     |
| rs27044 (G)                    | 204                     | 81      | 246              | 117     | -                          | -       | -                | -       |
| rs27434 (A)                    | 208                     | 77      | 258              | 105     | -                          | -       | -                | -       |
| rs27037 (T)                    | 149                     | 136     | 236              | 127     | -                          | -       | -                | -       |
| rs30187 (T)                    | 208                     | 77      | 259              | 104     | -                          | -       | -                | -       |
| rs17482078 (C)                 | 277                     | 8       | 356              | 7       | -                          | -       | -                | -       |
| rs10050860 (C)                 | 285                     | 0       | 362              | 1       | -                          | -       | -                | -       |

**Supplementary Data 4.** SNP genotypes for AS-GRS construction set.

| Sample_ID | Status | rs10865331 | rs27044 | rs27434 | rs27037 | rs30187 | rs17482078 | rs10050860 |
|-----------|--------|------------|---------|---------|---------|---------|------------|------------|
| AS001     | Case   | GG         | CC      | GG      | GG      | CC      | CC         | CC         |
| AS003     | Case   | AG         | CG      | AG      | GG      | CT      | CC         | CC         |
| AS004     | Case   | AG         | CG      | AG      | GT      | CT      | CC         | CC         |
| AS005     | Case   | AA         | CC      | GG      | GG      | CC      | CC         | CC         |
| AS006     | Case   | AA         | GG      | AA      | GT      | TT      | CC         | CC         |
| AS009     | Case   | AA         | GG      | AA      | GT      | TT      | CC         | CC         |
| AS010     | Case   | GG         | CG      | AG      | GT      | CT      | CC         | CC         |
| AS011     | Case   | GG         | CG      | AG      | GT      | CT      | CC         | CC         |
| AS012     | Case   | AA         | CG      | AG      | GT      | CT      | CC         | CC         |
| AS013     | Case   | AG         | CC      | AG      | GG      | CT      | CC         | CC         |
| AS014     | Case   | GG         | CC      | GG      | GG      | CC      | CC         | CC         |
| AS015     | Case   | AG         | CG      | AG      | GT      | CT      | CC         | CC         |
| AS023     | Case   | AA         | CC      | AG      | GG      | CT      | CC         | CC         |
| AS025     | Case   | GG         | CG      | AG      | GT      | CT      | CC         | CC         |
| AS026     | Case   | GG         | CG      | AG      | GG      | CT      | CC         | CC         |
| AS027     | Case   | AG         | CG      | AG      | GG      | CT      | CC         | CC         |
| AS028     | Case   | AA         | CG      | AA      | GT      | TT      | CC         | CC         |
| AS030     | Case   | GG         | CG      | AG      | GG      | CT      | CT         | CT         |
| AS032     | Case   | AG         | CG      | AG      | GT      | CT      | CC         | CC         |
| AS034     | Case   | AA         | CG      | AG      | GT      | CT      | CC         | CC         |
| AS036     | Case   | AA         | CG      | AG      | GG      | CT      | CC         | CC         |
| AS038     | Case   | AG         | CG      | AG      | GT      | CT      | CC         | CC         |
| AS040     | Case   | AG         | GG      | AA      | GG      | TT      | CC         | CC         |
| AS042     | Case   | GG         | CG      | AG      | GG      | CT      | CT         | CT         |
| AS043     | Case   | AA         | CG      | AG      | GG      | CT      | CC         | CC         |
| AS045     | Case   | AG         | CG      | AG      | GT      | CT      | CC         | CC         |
| AS046     | Case   | AG         | CC      | GG      | GG      | CC      | CC         | CC         |
| AS048     | Case   | GG         | CC      | GG      | GG      | CC      | CC         | CC         |
| AS049     | Case   | AG         | CG      | AG      | GG      | CT      | CC         | CC         |
| AS050     | Case   | GG         | CG      | AG      | GT      | CT      | CT         | CT         |
| AS051     | Case   | GG         | CG      | AG      | GG      | CT      | CT         | CT         |
| AS052     | Case   | AG         | CG      | AG      | GG      | CT      | CC         | CC         |
| AS053     | Case   | AG         | GG      | AA      | TT      | TT      | CC         | CC         |
| AS054     | Case   | AA         | CG      | AG      | GT      | CT      | CC         | CC         |
| AS058     | Case   | AG         | GG      | AA      | GT      | TT      | CC         | CC         |
| AS064     | Case   | AA         | GG      | AA      | TT      | TT      | CC         | CC         |
| AS068     | Case   | AA         | GG      | AA      | GT      | TT      | CC         | CC         |
| AS070     | Case   | AG         | CG      | AG      | GG      | CT      | CC         | CC         |
| AS072     | Case   | AG         | CC      | GG      | GG      | CC      | CC         | CC         |
| AS073     | Case   | AG         | CC      | GG      | GG      | CC      | CC         | CC         |
| AS075     | Case   | AA         | GG      | AA      | GT      | TT      | CC         | CC         |
| AS076     | Case   | AG         | CG      | AG      | GG      | CT      | CC         | CC         |
| AS078     | Case   | AA         | GG      | AA      | TT      | TT      | CC         | CC         |
| AS080     | Case   | AG         | GG      | AA      | GT      | TT      | CC         | CC         |
| AS082     | Case   | AG         | CC      | GG      | GG      | CC      | CC         | CC         |
| AS084     | Case   | AG         | CG      | AG      | GT      | CT      | CC         | CC         |
| AS086     | Case   | AG         | CG      | AG      | GT      | CT      | CC         | CC         |
| AS087     | Case   | AG         | CG      | AG      | GT      | CT      | CC         | CC         |
| AS089     | Case   | AA         | CG      | AG      | GT      | CT      | CC         | CC         |
| AS090     | Case   | AG         | CC      | GG      | GG      | CC      | CC         | CC         |
| AS091     | Case   | GG         | CG      | AA      | GG      | TT      | CC         | CC         |
| AS094     | Case   | AG         | CC      | GG      | GG      | CC      | CC         | CC         |
| AS096     | Case   | GG         | CG      | AG      | GT      | CT      | CC         | CC         |
| AS100     | Case   | AG         | CG      | AG      | GG      | CT      | CC         | CC         |
| AS101     | Case   | AG         | CG      | AG      | GG      | CT      | CC         | CC         |
| AS102     | Case   | GG         | CC      | GG      | GG      | CC      | CC         | CC         |
| AS103     | Case   | AG         | CC      | GG      | GG      | CC      | CT         | CT         |
| AS104     | Case   | AG         | CC      | GG      | GG      | CC      | CC         | CC         |
| AS108     | Case   | AG         | CG      | AG      | GT      | CT      | CC         | CC         |

Online supplement to: Developing a Risk-scoring model for Ankylosing Spondylitis Based on a Combination of HLA-B27, Single-nucleotide Polymorphism, and Copy Number Variant Markers. *The Journal of Rheumatology*. doi:10.3899/jrheum.160347

|       |      |    |    |    |    |    |    |    |
|-------|------|----|----|----|----|----|----|----|
| AS110 | Case | AG | CC | GG | GG | CC | CT | CT |
| AS112 | Case | AA | CG | AG | GT | CT | CC | CC |
| AS116 | Case | AG | GG | AA | TT | TT | CC | CC |
| AS121 | Case | GG | CC | GG | GT | CC | CC | CC |
| AS125 | Case | GG | CC | GG | GG | CC | CC | CC |
| AS126 | Case | AG | GG | AA | TT | TT | CC | CC |
| AS127 | Case | AG | CC | GG | GG | CC | CC | CC |
| AS128 | Case | AG | GG | AA | GT | TT | CC | CC |
| AS130 | Case | AG | CG | AG | GT | CT | CC | CC |
| AS131 | Case | AG | CG | AG | GG | CT | CC | CC |
| AS132 | Case | AG | GG | AA | TT | TT | CC | CC |
| AS133 | Case | AG | GG | AA | TT | TT | CC | CC |
| AS135 | Case | GG | CG | AG | GT | CT | CC | CC |
| AS137 | Case | AG | CC | GG | GT | CC | CC | CC |
| AS138 | Case | AG | GG | AA | GT | TT | CC | CC |
| AS140 | Case | GG | CC | GG | GG | CC | CC | CC |
| AS143 | Case | AG | GG | AA | GT | TT | CC | CC |
| AS144 | Case | AG | CG | AG | GT | CT | CC | CC |
| AS145 | Case | GG | CC | GG | GG | CC | CT | CT |
| AS146 | Case | AG | CG | AG | GG | CT | CC | CC |
| AS148 | Case | AG | CC | GG | GG | CC | CC | CC |
| AS149 | Case | AG | GG | AA | TT | TT | CC | CC |
| AS150 | Case | AA | CG | AG | GG | CT | CC | CC |
| AS151 | Case | AG | CG | GG | GG | CC | CC | CC |
| AS152 | Case | AG | CC | GG | GG | CC | CC | CC |
| AS153 | Case | GG | CG | AG | GG | CT | CC | CC |
| AS155 | Case | AA | CG | AG | GG | CT | CC | CC |
| AS156 | Case | AG | CG | AG | GG | CT | CC | CC |
| AS157 | Case | GG | GG | AA | GT | TT | CC | CC |
| AS158 | Case | AG | CG | AG | GG | CT | CC | CC |
| AS159 | Case | AA | GG | AA | TT | TT | CC | CC |
| AS162 | Case | AA | CG | AG | GT | CT | CC | CC |
| AS163 | Case | AG | CC | GG | GG | CC | CC | CC |
| AS164 | Case | AG | CC | GG | GG | CC | CC | CC |
| AS166 | Case | AA | CG | AG | GT | CT | CC | CC |
| AS169 | Case | AG | GG | AA | GT | TT | CC | CC |
| AS170 | Case | GG | CC | GG | GG | CC | CC | CC |
| AS171 | Case | AG | CC | GG | GG | CC | CC | CC |
| AS174 | Case | AG | CG | AG | GG | CT | CC | CC |
| AS176 | Case | GG | CG | AG | GT | CT | CC | CC |
| AS179 | Case | AG | CC | GG | GG | CC | CT | CT |
| AS182 | Case | AG | CC | GG | GG | CC | CC | CC |
| AS183 | Case | AG | CG | AG | GT | CT | CC | CC |
| AS184 | Case | AA | CG | AG | GT | CT | CC | CC |
| AS185 | Case | AG | GG | AA | TT | TT | CC | CC |
| AS186 | Case | AG | GG | AA | GG | TT | CC | CC |
| AS188 | Case | AA | CG | AG | GG | CT | CC | CC |
| AS189 | Case | AG | CG | AG | GT | CT | CC | CC |
| AS191 | Case | AG | CG | AG | GT | CT | CC | CC |
| AS192 | Case | GG | CC | GG | GG | CC | CC | CC |
| AS198 | Case | AG | CC | GG | GG | CC | CC | CC |
| AS199 | Case | AG | CC | GG | GG | CC | CC | CC |
| AS200 | Case | AG | CC | GG | GG | CC | CC | CC |
| AS201 | Case | AA | CG | AG | GT | CT | CC | CC |
| AS204 | Case | AA | CG | AA | GT | TT | CC | CC |
| AS206 | Case | GG | GG | AA | GG | TT | CC | CC |
| AS207 | Case | AA | CC | GG | GG | CC | CC | CC |
| AS209 | Case | GG | GG | AA | GT | TT | CC | CC |
| AS211 | Case | AA | GG | AA | TT | TT | CC | CC |
| AS213 | Case | GG | CG | AG | GG | CT | CC | CC |
| AS215 | Case | AA | CC | GG | GG | CC | CC | CC |
| AS216 | Case | AA | GG | AA | GT | TT | CC | CC |

Online supplement to: Developing a Risk-scoring model for Ankylosing Spondylitis Based on a Combination of HLA-B27, Single-nucleotide Polymorphism, and Copy Number Variant Markers. *The Journal of Rheumatology*. doi:10.3899/jrheum.160347

|       |      |    |    |    |    |    |    |    |
|-------|------|----|----|----|----|----|----|----|
| AS218 | Case | AG | CG | AG | GG | CT | CC | CC |
| AS220 | Case | AG | GG | AA | TT | TT | CC | CC |
| AS221 | Case | GG | CC | GG | GG | CC | CC | CC |
| AS222 | Case | AG | CC | GG | GG | CC | CC | CC |
| AS226 | Case | AG | CG | AG | GT | CT | CC | CC |
| AS227 | Case | GG | CG | AG | TT | CT | CC | CC |
| AS237 | Case | AG | CG | AG | GG | CT | CC | CC |
| AS239 | Case | AA | CG | AG | GT | CT | CC | CC |
| AS242 | Case | AG | GG | AA | TT | TT | CC | CC |
| AS245 | Case | GG | CG | AG | GT | CT | CC | CC |
| AS247 | Case | AA | CG | AG | GT | CT | CC | CC |
| AS248 | Case | AA | GG | AA | GT | TT | CC | CC |
| AS249 | Case | AA | CG | AG | GT | CT | CC | CC |
| AS250 | Case | GG | CC | GG | GG | CC | CC | CC |
| AS251 | Case | AA | CC | GG | GG | CC | CC | CC |
| AS252 | Case | AG | CG | AG | GT | CT | CC | CC |
| AS253 | Case | AG | CG | AG | GG | CT | CT | CT |
| AS254 | Case | AG | GG | AA | TT | TT | CC | CC |
| AS256 | Case | AG | CG | AG | GT | CT | CC | CC |
| AS257 | Case | AG | CG | AG | GT | CT | CC | CC |
| AS258 | Case | AG | GG | AA | GT | TT | CC | CC |
| AS259 | Case | AA | CG | AG | GT | CT | CC | CC |
| AS261 | Case | AG | CC | GG | GG | CC | CC | CC |
| AS266 | Case | GG | CC | GG | GG | CC | CC | CC |
| AS267 | Case | AG | CG | AG | GT | CT | CC | CC |
| AS268 | Case | AA | CG | AG | GG | CT | CC | CC |
| AS269 | Case | AA | CG | AG | GT | CT | CC | CC |
| AS272 | Case | AA | CG | AG | GT | CT | CC | CC |
| AS273 | Case | AG | CC | GG | GG | CC | CC | CC |
| AS275 | Case | GG | CG | AG | GT | CT | CC | CC |
| AS278 | Case | AG | CG | AG | GT | CT | CC | CC |
| AS279 | Case | AG | CG | AG | GG | CT | CC | CC |
| AS280 | Case | AG | CC | GG | GG | CC | CC | CC |
| AS283 | Case | AA | GG | AA | GT | TT | CC | CC |
| AS291 | Case | AA | CG | AG | GT | CT | CC | CC |
| AS292 | Case | AA | CG | AG | GT | CT | CC | CC |
| AS293 | Case | AG | CG | AG | GG | CT | CC | CC |
| AS296 | Case | AA | CC | GG | GG | CC | CC | CC |
| AS297 | Case | AG | CG | AG | GG | CT | CC | CC |
| AS300 | Case | AG | CG | AG | GG | CT | CC | CC |
| AS308 | Case | AG | GG | AA | TT | TT | CC | CC |
| AS309 | Case | AA | CG | AG | GG | CT | CT | CT |
| AS310 | Case | AG | CG | AG | GT | CT | CC | CC |
| AS312 | Case | GG | CG | AG | GG | CT | CC | CC |
| AS313 | Case | AG | CG | AG | GT | CT | CC | CC |
| AS314 | Case | AG | GG | AA | GT | TT | CC | CC |
| AS315 | Case | AG | CG | AG | GG | CT | CC | CC |
| AS316 | Case | AG | CG | AG | GG | CT | CC | CC |
| AS318 | Case | GG | CG | AG | GT | CT | CC | CC |
| AS321 | Case | AG | CG | AG | GT | CT | CC | CC |
| AS326 | Case | AA | CC | GG | GG | CC | CC | CC |
| AS327 | Case | GG | CG | AG | GT | CT | CC | CC |
| AS329 | Case | AG | CG | AG | GG | CT | CT | CT |
| AS342 | Case | AG | CG | AG | GG | CT | CC | CC |
| AS343 | Case | AG | CG | AG | GT | CT | CC | CC |
| AS346 | Case | AG | CC | GG | GG | CC | CC | CC |
| AS348 | Case | GG | CC | GG | GG | CC | CT | CT |
| AS349 | Case | AG | CC | GG | GG | CC | CC | CC |
| AS351 | Case | AG | CG | AG | GT | CT | CC | CC |
| AS352 | Case | AG | CG | AG | GG | CT | CC | CC |
| AS353 | Case | AG | CG | AG | GG | CT | CT | CT |
| AS354 | Case | GG | CG | AG | GT | CT | CC | CC |

Online supplement to: Developing a Risk-scoring model for Ankylosing Spondylitis Based on a Combination of HLA-B27, Single-nucleotide Polymorphism, and Copy Number Variant Markers. *The Journal of Rheumatology*. doi:10.3899/jrheum.160347

|        |      |    |    |    |    |    |    |    |
|--------|------|----|----|----|----|----|----|----|
| AS357  | Case | AG | GG | AA | GT | TT | CC | CC |
| AS359  | Case | AG | GG | AA | TT | TT | CC | CC |
| AS360  | Case | AG | CG | AG | GT | CT | CC | CC |
| AS361  | Case | AG | GG | AA | GT | TT | CC | CC |
| AS363  | Case | AA | CG | AG | GT | CT | CC | CC |
| AS364  | Case | GG | CG | AG | GT | CT | CC | CC |
| AS367  | Case | GG | CG | AG | GT | CT | CC | CC |
| AS368  | Case | AG | CC | GG | GG | CC | CC | CC |
| AS370  | Case | GG | CC | AG | GG | CT | CC | CC |
| AS371  | Case | AG | CG | AG | GT | CT | CC | CC |
| AS372  | Case | AG | CG | AG | GT | CT | CC | CC |
| AS373  | Case | AG | CG | AG | GG | CT | CT | CT |
| AS374  | Case | GG | CG | AG | GG | CT | CC | CC |
| AS375  | Case | AG | CG | AG | GG | CT | CC | CC |
| AS376  | Case | GG | CG | AG | GG | CT | CC | CC |
| AS377  | Case | AG | CC | GG | GG | CC | CC | CC |
| AS384  | Case | AG | CC | GG | GG | CC | CC | CC |
| AS385  | Case | AA | CG | AG | GG | CT | CC | CC |
| AS387  | Case | AG | GG | AA | GT | TT | CC | CC |
| AS388  | Case | AG | CG | AA | GT | TT | CC | CC |
| AS392  | Case | GG | CC | GG | GG | CC | CC | CC |
| AS394  | Case | AA | CG | AG | GT | CT | CC | CC |
| AS395  | Case | AA | CC | GG | GG | CC | CC | CC |
| AS398  | Case | GG | CC | GG | GG | CC | CC | CC |
| AS399  | Case | GG | CG | AG | GT | CT | CC | CC |
| AS400  | Case | AG | CG | AG | GT | CT | CC | CC |
| ASR001 | Case | AG | CC | GG | GG | CC | CC | CC |
| ASR002 | Case | AG | CG | AG | GG | CT | CC | CC |
| ASR003 | Case | GG | CC | GG | GG | CC | TT | CT |
| ASR004 | Case | GG | CG | AG | GT | CT | CC | CC |
| ASR005 | Case | GG | CG | AG | GT | CT | CC | CC |
| ASR008 | Case | AA | GG | AA | GT | TT | CC | CC |
| ASR009 | Case | AG | GG | AA | GG | TT | CC | CC |
| ASR010 | Case | AG | CC | AG | GG | CT | CC | CC |
| ASR012 | Case | AA | CG | AG | GG | CT | CC | CC |
| ASR013 | Case | AG | GG | AA | TT | TT | CC | CC |
| ASR014 | Case | GG | CC | GG | GG | CC | CC | CC |
| ASR015 | Case | GG | CC | GG | GG | CC | CC | CC |
| ASR017 | Case | AA | CG | AG | GT | CT | CC | CC |
| ASR018 | Case | AG | GG | AA | TT | TT | CC | CC |
| ASR019 | Case | AG | CC | GG | GG | CC | CC | CC |
| ASR025 | Case | AG | GG | AA | TT | TT | CC | CC |
| ASR027 | Case | AA | GG | AA | TT | TT | CC | CC |
| ASR029 | Case | AG | GG | AA | TT | TT | CC | CC |
| ASR031 | Case | AG | CC | GG | GG | CC | CC | CC |
| ASR032 | Case | AG | GG | AA | TT | TT | CC | CC |
| ASR034 | Case | AG | CC | AG | GG | CT | CC | CC |
| ASR041 | Case | AG | CG | AG | GG | CT | CC | CC |
| ASR042 | Case | AG | CG | AG | GT | CT | CC | CC |
| ASR044 | Case | AA | GG | AA | GT | TT | CC | CC |
| ASR046 | Case | AA | GG | AA | GT | TT | CC | CC |
| ASR047 | Case | GG | CC | GG | GG | CC | CC | CC |
| ASR048 | Case | AA | CG | AG | GT | CT | CC | CC |
| ASR054 | Case | GG | CC | GG | GG | CC | CC | CC |
| ASR058 | Case | AG | CC | GG | GG | CC | TT | CT |
| ASR059 | Case | AG | CG | AG | GT | CT | CC | CC |
| ASR063 | Case | GG | CG | AG | GT | CT | TT | CT |
| ASR067 | Case | AG | CG | AG | GT | CT | CC | CC |
| ASR069 | Case | AA | CG | AG | GT | CT | TT | CT |
| ASR071 | Case | GG | CC | GG | GG | CC | CC | CC |
| ASR072 | Case | AG | CC | GG | GG | CC | CC | CC |
| ASR077 | Case | GG | CC | GG | GG | CC | CC | CC |

Online supplement to: Developing a Risk-scoring model for Ankylosing Spondylitis Based on a Combination of HLA-B27, Single-nucleotide Polymorphism, and Copy Number Variant Markers. *The Journal of Rheumatology*. doi:10.3899/jrheum.160347

|         |         |    |    |    |    |    |    |    |
|---------|---------|----|----|----|----|----|----|----|
| ASR078  | Case    | AG | CC | GG | GG | CC | TT | CT |
| ASR079  | Case    | AG | CG | AG | GT | CT | TT | CT |
| ASR080  | Case    | AG | CG | AG | GG | CT | TT | CT |
| ASR081  | Case    | AG | GG | AA | TT | TT | CC | CC |
| ASR082  | Case    | AG | CG | AG | GT | CT | CC | CC |
| ASR083  | Case    | AG | CC | GG | GG | CC | CC | CC |
| ASR084  | Case    | AA | CC | GG | GG | CC | CC | CC |
| ASR085  | Case    | AG | CG | AG | GT | CT | CC | CC |
| ASR086  | Case    | AG | CG | AG | GT | CT | CC | CC |
| ASR088  | Case    | AG | CG | AG | GT | CT | CC | CC |
| ASR090  | Case    | AG | CG | AG | GT | CT | CC | CC |
| ASR091  | Case    | AA | CG | AG | GT | CT | CC | CC |
| ASR092  | Case    | AG | GG | AA | TT | TT | CC | CC |
| ASR096  | Case    | AG | GG | AA | GT | TT | CC | CC |
| ASR099  | Case    | GG | CG | AG | GG | CT | TT | CT |
| ASR101  | Case    | AG | CG | AG | GT | CT | CC | CC |
| ASR102  | Case    | AA | CG | AG | GT | CT | CC | CC |
| ASR105  | Case    | GG | CC | GG | GG | CC | CC | CC |
| ASR106  | Case    | AG | CG | AA | GT | TT | CC | CC |
| ASR107  | Case    | AG | CC | GG | GG | CC | CC | CC |
| ASR109  | Case    | AG | CG | AG | GG | CT | CC | CC |
| ASR111  | Case    | GG | CG | AA | GT | TT | CC | CC |
| ASR112  | Case    | AG | GG | AA | GT | TT | CC | CC |
| ASR113  | Case    | GG | CC | GG | GG | CC | CC | CC |
| ASR118  | Case    | GG | CG | AG | GT | CT | CC | CC |
| ASR120  | Case    | AG | CC | GG | GG | CC | CC | CC |
| ASR122  | Case    | AG | GG | AA | GT | TT | CC | CC |
| ASR123  | Case    | AG | GG | AA | TT | TT | CC | CC |
| ASR126  | Case    | GG | CG | AA | GT | TT | CC | CC |
| ASR131  | Case    | AG | GG | AA | GT | TT | CC | CC |
| ASR134  | Case    | AG | GG | AA | TT | TT | CC | CC |
| ASR136  | Case    | AG | GG | AA | TT | TT | CC | CC |
| ASR137  | Case    | GG | CC | GG | GT | CC | CC | CC |
| ASR145  | Case    | AG | CC | GG | GG | CC | CC | CC |
| ASR147  | Case    | AG | CC | GG | GG | CC | CC | CC |
| ASR156  | Case    | AG | CC | GG | GG | CC | CC | CC |
| ASR159  | Case    | AG | GG | AA | TT | TT | CC | CC |
| ASR162  | Case    | AG | GG | AA | GG | TT | CC | CC |
| ASR165  | Case    | AG | GG | AA | GT | TT | CC | CC |
| ASR166  | Case    | AG | CG | AG | GT | CT | CC | CC |
| ASC002  | Control | AG | CG | AG | GT | CT | CC | CC |
| ASC022  | Control | GG | CG | AA | GT | TT | CC | CC |
| ASC035  | Control | AG | CG | AG | GT | CT | CC | CC |
| ASC041  | Control | AG | CC | GG | GG | CC | CC | CC |
| ASC047  | Control | AG | GG | AA | GT | TT | CC | CC |
| ASC055  | Control | GG | CG | AG | GT | CT | CC | CC |
| ASC060  | Control | GG | CG | AG | GT | CT | CC | CC |
| ASC063  | Control | AG | CG | AG | GT | CT | CC | CC |
| ASC064  | Control | AG | CC | GG | GG | CC | CC | CC |
| ASC065  | Control | AG | CG | AG | GT | CT | CC | CC |
| ASC066  | Control | GG | GG | AA | TT | TT | CC | CC |
| ASC071  | Control | GG | CG | AG | GT | CT | CC | CC |
| ASC072  | Control | GG | GG | AA | GT | TT | CC | CC |
| ASC074  | Control | GG | CG | AG | GT | CT | CC | CC |
| ASC081  | Control | GG | CG | AG | GT | CT | CC | CC |
| ASC087  | Control | GG | CC | AG | GG | CT | CC | CC |
| ASC089  | Control | GG | CG | AG | GT | CT | CC | CC |
| ASC096  | Control | AG | CG | AG | GT | CT | CC | CC |
| ASC097  | Control | GG | CG | AG | GT | CT | CC | CC |
| ASC099  | Control | GG | CC | GG | GG | CC | CC | CC |
| ASC1001 | Control | AG | GG | AA | TT | TT | CC | CC |
| ASC1005 | Control | AG | CG | AG | GG | CT | CC | CC |

Online supplement to: Developing a Risk-scoring model for Ankylosing Spondylitis Based on a Combination of HLA-B27, Single-nucleotide Polymorphism, and Copy Number Variant Markers. *The Journal of Rheumatology*. doi:10.3899/jrheum.160347

|         |         |    |    |    |    |    |    |    |
|---------|---------|----|----|----|----|----|----|----|
| ASC101  | Control | AG | CG | AG | GT | CT | CC | CC |
| ASC1011 | Control | AG | CG | AG | GT | CT | CC | CC |
| ASC1012 | Control | AA | CC | GG | GT | CC | CC | CC |
| ASC1015 | Control | AG | GG | AA | GT | TT | CC | CC |
| ASC1019 | Control | AG | CG | AG | GT | CT | CC | CC |
| ASC104  | Control | GG | CG | AG | GT | CT | CT | CT |
| ASC105  | Control | AA | CC | GG | GG | CC | CC | CC |
| ASC107  | Control | AG | CG | AG | GT | CT | CC | CC |
| ASC110  | Control | AG | CG | AG | GT | CT | CC | CC |
| ASC114  | Control | AG | CG | AG | GT | CT | CC | CC |
| ASC122  | Control | AG | CC | GG | GG | CC | CC | CC |
| ASC129  | Control | GG | GG | AA | TT | TT | CC | CC |
| ASC131  | Control | GG | CC | GG | GT | CC | CC | CC |
| ASC133  | Control | AG | CC | GG | GG | CC | CC | CC |
| ASC135  | Control | GG | CC | GG | GG | CC | CC | CC |
| ASC136  | Control | GG | GG | AA | GT | TT | CC | CC |
| ASC140  | Control | AG | CC | GG | GG | CC | CC | CC |
| ASC143  | Control | GG | CG | AG | GG | CT | CC | CC |
| ASC145  | Control | AA | CC | GG | GG | CC | CC | CC |
| ASC146  | Control | AG | CG | AG | GT | CT | CC | CC |
| ASC150  | Control | GG | CC | GG | GG | CC | CC | CC |
| ASC154  | Control | AG | CG | AG | GT | CT | CT | CT |
| ASC155  | Control | GG | CC | GG | GG | CC | CC | CC |
| ASC157  | Control | AG | GG | AA | TT | TT | CC | CC |
| ASC158  | Control | GG | CG | AG | GT | CT | CT | CT |
| ASC160  | Control | AA | GG | AA | GT | TT | CC | CC |
| ASC162  | Control | GG | CC | GG | GG | CC | CC | CC |
| ASC163  | Control | GG | CG | AG | GT | CT | CC | CC |
| ASC165  | Control | AG | CG | AG | GT | CT | CC | CC |
| ASC176  | Control | GG | CG | AG | GT | CT | CC | CC |
| ASC182  | Control | AG | CG | AG | GT | CT | CT | CT |
| ASC184  | Control | AG | CG | AG | GT | CT | CC | CC |
| ASC185  | Control | GG | GG | AA | TT | TT | CC | CC |
| ASC186  | Control | GG | CC | GG | GG | CC | CC | CC |
| ASC191  | Control | GG | CC | GG | GG | CC | CC | CC |
| ASC201  | Control | GG | CG | AG | GT | CT | CC | CC |
| ASC209  | Control | AG | GG | AA | GT | TT | CC | CC |
| ASC214  | Control | GG | CG | AG | GT | CT | CC | CC |
| ASC217  | Control | AG | CC | GG | GG | CC | CC | CC |
| ASC239  | Control | AG | CG | AG | GT | CT | CC | CC |
| ASC249  | Control | GG | GG | AA | GT | TT | CC | CC |
| ASC259  | Control | GG | CC | AG | GG | CT | CC | CC |
| ASC265  | Control | GG | CC | GG | GG | CC | CC | CC |
| ASC270  | Control | AG | CC | GG | GG | CC | CC | CC |
| ASC273  | Control | GG | CG | AG | GT | CT | CC | CC |
| ASC276  | Control | AG | GG | AA | TT | TT | CC | CC |
| ASC277  | Control | GG | CC | GG | GG | CC | CC | CC |
| ASC281  | Control | GG | CC | AG | GG | CT | CC | CC |
| ASC286  | Control | GG | CC | GG | GG | CC | CC | CC |
| ASC292  | Control | GG | CG | AG | GG | CT | CC | CC |
| ASC295  | Control | GG | CC | GG | GG | CC | CC | CC |
| ASC307  | Control | GG | GG | AA | GT | TT | CC | CC |
| ASC309  | Control | AG | GG | AA | TT | TT | CC | CC |
| ASC310  | Control | AA | GG | AA | GT | TT | CC | CC |
| ASC312  | Control | AG | CG | AG | GT | CT | CC | CC |
| ASC313  | Control | AG | CG | AG | GT | CT | CC | CC |
| ASC321  | Control | AG | GG | AA | GT | TT | CC | CC |
| ASC330  | Control | AA | CC | GG | GG | CC | CT | CT |
| ASC333  | Control | GG | CC | GG | GG | CC | CC | CC |
| ASC334  | Control | AG | CG | AG | GT | CT | CC | CC |
| ASC335  | Control | AG | CC | GG | GG | CC | CC | CC |
| ASC338  | Control | AG | CC | AG | GG | CT | CC | CC |



Online supplement to: Developing a Risk-scoring model for Ankylosing Spondylitis Based on a Combination of HLA-B27, Single-nucleotide Polymorphism, and Copy Number Variant Markers. *The Journal of Rheumatology*. doi:10.3899/jrheum.160347

|        |         |    |    |    |    |    |    |    |
|--------|---------|----|----|----|----|----|----|----|
| ASC349 | Control | GG | CC | GG | GG | CC | CC | CC |
| ASC354 | Control | AG | GG | AA | TT | TT | CC | CC |
| ASC361 | Control | GG | GG | AA | TT | TT | CC | CC |
| ASC378 | Control | GG | CC | GG | GG | CC | CC | CC |
| ASC381 | Control | GG | CC | GG | GG | CC | CC | CC |
| ASC384 | Control | AA | CG | AG | GT | CT | CT | CT |
| ASC387 | Control | AG | CC | GG | GG | CC | CC | CC |
| ASC391 | Control | GG | CC | GG | GG | CC | CC | CC |
| ASC393 | Control | AG | CG | AG | GT | CT | CC | CC |
| ASC400 | Control | GG | GG | AA | TT | TT | CC | CC |
| ASC404 | Control | GG | CG | AG | GT | CT | CC | CC |
| ASC409 | Control | AG | GG | AA | GT | TT | CC | CC |
| ASC415 | Control | AG | GG | AA | GT | TT | CC | CC |
| ASC417 | Control | AG | CG | AA | TT | TT | CC | CC |
| ASC422 | Control | AG | CG | AG | GT | CT | CC | CC |
| ASC424 | Control | AG | CC | GG | GG | CC | CC | CC |
| ASC433 | Control | GG | CC | GG | GG | CC | CC | CC |
| ASC439 | Control | AG | GG | AA | TT | TT | CC | CC |
| ASC444 | Control | GG | CC | GG | GG | CC | CC | CC |
| ASC448 | Control | GG | CG | AG | GT | CT | CT | CT |
| ASC450 | Control | AG | CG | AG | GT | CT | CC | CC |
| ASC452 | Control | AG | CG | AG | GT | CT | CC | CC |
| ASC453 | Control | AG | CG | AG | GT | CT | CC | CC |
| ASC456 | Control | GG | CC | AG | GG | CT | CC | CC |
| ASC457 | Control | GG | GG | AA | TT | TT | CC | CC |
| ASC458 | Control | GG | CC | GG | GG | CC | CC | CC |
| ASC460 | Control | GG | GG | AA | GT | TT | CC | CC |
| ASC464 | Control | AG | CG | AG | GT | CT | CC | CC |
| ASC466 | Control | GG | CG | AG | GT | CT | CC | CC |
| ASC467 | Control | GG | GG | AA | TT | TT | CC | CC |
| ASC468 | Control | AG | CG | AG | GG | CT | CC | CC |
| ASC471 | Control | AG | CC | GG | GG | CC | CC | CC |
| ASC479 | Control | AG | CC | GG | GG | CC | CC | CC |
| ASC480 | Control | GG | CG | AG | GT | CT | CC | CC |
| ASC481 | Control | GG | CG | AG | GT | CT | CC | CC |
| ASC482 | Control | AG | CC | GG | GG | CC | CC | CC |
| ASC485 | Control | GG | CG | AG | GT | CT | CC | CC |
| ASC486 | Control | GG | CC | GG | GG | CC | CC | CC |
| ASC489 | Control | AG | CG | AG | GT | CT | CC | CC |
| ASC494 | Control | GG | CG | AA | GT | TT | CC | CC |
| ASC495 | Control | GG | CG | AG | TT | CT | CC | CC |
| ASC496 | Control | GG | CG | AG | GT | CT | CC | CC |
| ASC497 | Control | GG | CC | GG | GG | CC | CC | CC |
| ASC499 | Control | GG | CC | GG | GG | CC | CC | CC |
| ASC507 | Control | AA | GG | AA | TT | TT | CC | CC |
| ASC512 | Control | AG | CG | AG | GT | CT | CC | CC |
| ASC515 | Control | GG | GG | AA | TT | TT | CC | CC |
| ASC516 | Control | AG | CC | GG | GG | CC | CC | CC |
| ASC519 | Control | AG | CG | AG | GT | CT | CC | CC |
| ASC521 | Control | GG | CC | GG | GG | CC | CT | CT |
| ASC524 | Control | GG | CG | AG | GT | CT | CT | CT |
| ASC535 | Control | GG | CG | AG | GT | CT | CC | CC |
| ASC536 | Control | AG | CG | AG | GT | CT | CC | CC |
| ASC543 | Control | AG | GG | AA | TT | TT | CC | CC |
| ASC545 | Control | GG | CC | GG | GG | CC | CC | CC |
| ASC553 | Control | GG | CG | AG | GT | CT | CC | CC |
| ASC555 | Control | AG | CC | GG | GG | CC | CC | CC |
| ASC558 | Control | AG | CG | AG | GT | CT | CC | CC |
| ASC560 | Control | AG | CG | AG | GT | CT | CT | CT |
| ASC563 | Control | GG | GG | AA | TT | TT | CC | CC |
| ASC570 | Control | AG | CC | GG | GG | CC | CC | CC |
| ASC571 | Control | AA | CG | AG | GT | CT | CC | CC |

Online supplement to: Developing a Risk-scoring model for Ankylosing Spondylitis Based on a Combination of HLA-B27, Single-nucleotide Polymorphism, and Copy Number Variant Markers. *The Journal of Rheumatology*. doi:10.3899/jrheum.160347

|        |         |    |    |    |    |    |    |    |
|--------|---------|----|----|----|----|----|----|----|
| ASC572 | Control | AG | CC | GG | GG | CC | CC | CC |
| ASC575 | Control | AG | GG | AA | TT | TT | CC | CC |
| ASC581 | Control | AA | GG | AA | GT | TT | CC | CC |
| ASC587 | Control | AG | CG | AG | GT | CT | CC | CC |
| ASC594 | Control | GG | GG | AA | TT | TT | CC | CC |
| ASC595 | Control | GG | CG | AA | GT | TT | CC | CC |
| ASC597 | Control | GG | CG | AG | GG | CT | CC | CC |
| ASC598 | Control | AG | GG | AA | GT | TT | CC | CC |
| ASC599 | Control | AG | GG | AA | TT | TT | CC | CC |
| ASC600 | Control | GG | CG | AG | GT | CT | CC | CC |
| ASC603 | Control | GG | CG | AG | GT | CT | CC | CC |
| ASC604 | Control | GG | CG | AG | GT | CT | CC | CC |
| ASC620 | Control | AA | GG | AA | GG | TT | CC | CC |
| ASC628 | Control | AA | CG | AG | GT | CT | CC | CC |
| ASC631 | Control | GG | CC | GG | GG | CC | CC | CC |
| ASC632 | Control | GG | CG | AG | GT | CT | CT | CT |
| ASC638 | Control | AG | CC | GG | GG | CC | CT | CT |
| ASC640 | Control | GG | GG | AA | GT | TT | CC | CC |
| ASC643 | Control | GG | CG | AG | GT | CT | CC | CC |
| ASC646 | Control | GG | CC | GG | GG | CC | CC | CC |
| ASC647 | Control | AG | CG | AG | GG | CT | CC | CC |
| ASC649 | Control | AG | CC | GG | GG | CC | CC | CC |
| ASC651 | Control | AG | CG | AG | GT | CT | CC | CC |
| ASC655 | Control | AG | CC | GG | GG | CC | CC | CC |
| ASC656 | Control | GG | GG | AA | TT | TT | CC | CC |
| ASC658 | Control | AG | CG | AG | GT | CT | CC | CC |
| ASC661 | Control | GG | CC | GG | GG | CC | CC | CC |
| ASC664 | Control | AA | CG | AG | GT | CT | CC | CC |
| ASC665 | Control | AA | CG | AG | GT | CT | CC | CC |
| ASC668 | Control | GG | CG | AG | GT | CT | CC | CC |
| ASC672 | Control | AG | CG | AG | GG | CT | CC | CC |
| ASC673 | Control | AG | CG | AG | GT | CT | CC | CC |
| ASC674 | Control | AG | GG | AA | GT | TT | CC | CC |
| ASC675 | Control | AG | GG | AA | GT | TT | CC | CC |
| ASC676 | Control | GG | CC | GG | GG | CC | CT | CT |
| ASC678 | Control | GG | CG | AG | GT | CT | CT | CT |
| ASC679 | Control | GG | CG | AG | GT | CT | CC | CC |
| ASC687 | Control | GG | CG | AG | GT | CT | CC | CC |
| ASC689 | Control | GG | CG | AG | GT | CT | CC | CC |
| ASC703 | Control | AA | GG | AA | GT | TT | CC | CC |
| ASC711 | Control | AG | CC | AG | GG | CC | CC | CC |
| ASC712 | Control | GG | CC | GG | GG | TT | TT | TT |
| ASC717 | Control | GG | CC | GG | GG | CC | CC | CC |
| ASC718 | Control | AA | GG | AA | GT | TT | CC | CC |
| ASC722 | Control | GG | CG | AA | GT | CC | CC | CC |
| ASC725 | Control | GG | GG | AA | GT | TT | CC | CC |
| ASC728 | Control | GG | CC | GG | GG | CC | CC | CC |
| ASC730 | Control | AG | CC | GG | GG | CT | CC | CC |
| ASC735 | Control | AG | CC | AG | GG | CT | CC | CC |
| ASC744 | Control | AG | CC | GG | GG | CT | CC | CC |
| ASC746 | Control | GG | GG | AA | TT | CT | CC | CC |
| ASC757 | Control | AG | CC | GG | GG | CC | CC | CC |
| ASC759 | Control | AA | GG | AA | TT | TT | CC | CC |
| ASC769 | Control | AG | GG | AA | TT | TT | CC | CC |
| ASC772 | Control | GG | CG | AG | GT | CT | CC | CC |
| ASC782 | Control | GG | CG | AG | GT | CT | CC | CC |
| ASC789 | Control | GG | GG | AA | GT | TT | CC | CC |
| ASC790 | Control | AG | GG | AA | TT | TT | CC | CC |
| ASC791 | Control | AG | CG | AG | GT | CT | CC | CC |
| ASC792 | Control | GG | CG | AG | TT | CT | CC | CC |
| ASC793 | Control | AG | CG | AG | GT | CT | CC | CC |
| ASC795 | Control | AG | CC | GG | GG | CC | CC | CC |

Online supplement to: Developing a Risk-scoring model for Ankylosing Spondylitis Based on a Combination of HLA-B27, Single-nucleotide Polymorphism, and Copy Number Variant Markers. *The Journal of Rheumatology*. doi:10.3899/jrheum.160347

|        |         |    |    |    |    |    |    |    |
|--------|---------|----|----|----|----|----|----|----|
| ASC796 | Control | GG | CG | AG | GT | CT | CC | CC |
| ASC798 | Control | GG | CC | GG | GG | CC | CC | CC |
| ASC803 | Control | AG | CG | AG | GT | CT | CC | CC |
| ASC807 | Control | AG | CG | AA | GT | TT | CC | CC |
| ASC808 | Control | GG | CG | AG | GT | CT | CC | CC |
| ASC811 | Control | AG | GG | AA | GT | TT | CC | CC |
| ASC812 | Control | GG | GG | AA | TT | TT | CC | CC |
| ASC813 | Control | GG | GG | AA | TT | TT | CC | CC |
| ASC815 | Control | AG | CG | AG | GT | CT | CC | CC |
| ASC816 | Control | GG | CG | AG | GT | CT | CC | CC |
| ASC828 | Control | AG | CG | AG | GT | CT | CC | CC |
| ASC830 | Control | GG | GG | AA | GT | TT | CC | CC |
| ASC833 | Control | AA | GG | AA | GT | TT | CC | CC |
| ASC835 | Control | AG | GG | AA | TT | TT | CC | CC |
| ASC836 | Control | AG | CC | GG | GG | CC | CC | CC |
| ASC838 | Control | GG | GG | AA | TT | TT | CC | CC |
| ASC841 | Control | AA | CG | AG | GT | CT | CC | CC |
| ASC844 | Control | AG | CC | GG | GG | CC | CC | CC |
| ASC846 | Control | AG | CG | AG | GT | CT | CC | CC |
| ASC848 | Control | GG | CC | GG | GG | CC | CC | CC |
| ASC852 | Control | AA | GG | AA | GT | TT | CC | CC |
| ASC853 | Control | GG | CG | AA | GT | TT | CC | CC |
| ASC858 | Control | GG | CC | GG | GG | CC | CC | CC |
| ASC864 | Control | AG | CC | GG | GG | CC | TT | CT |
| ASC869 | Control | AG | CC | GG | GG | CC | CC | CC |
| ASC873 | Control | GG | CC | GG | GG | CC | CC | CC |
| ASC890 | Control | GG | CC | GG | GG | CC | CC | CC |
| ASC892 | Control | AA | CG | AG | GT | CT | CC | CC |
| ASC894 | Control | AG | CG | AG | GT | CT | CC | CC |
| ASC896 | Control | AG | CC | GG | GG | CC | CC | CC |
| ASC899 | Control | AG | CG | AG | GT | CT | TT | CT |
| ASC903 | Control | AG | GG | AA | GT | TT | CC | CC |
| ASC904 | Control | GG | CC | GG | GG | CC | CC | CC |
| ASC909 | Control | AG | CG | AG | GT | CT | CC | CC |
| ASC915 | Control | AG | CC | AG | GG | CT | CC | CC |
| ASC918 | Control | GG | CG | AG | GG | CT | CC | CC |
| ASC919 | Control | GG | CG | AG | GT | CT | CC | CC |
| ASC924 | Control | GG | GG | AA | GT | TT | CC | CC |
| ASC930 | Control | AA | CC | GG | GG | CC | CC | CC |
| ASC938 | Control | GG | CG | AG | GT | CT | TT | CT |
| ASC941 | Control | AG | CG | AG | GT | CT | CC | CC |
| ASC943 | Control | AG | CG | AG | GT | CT | CC | CC |
| ASC944 | Control | AG | CG | AG | GT | CT | CC | CC |
| ASC945 | Control | AG | GG | AA | GT | TT | CC | CC |
| ASC950 | Control | GG | CG | AG | GT | CT | CC | CC |
| ASC959 | Control | AG | GG | AA | TT | TT | CC | CC |
| ASC962 | Control | AG | CG | AG | GT | CT | CC | CC |
| ASC966 | Control | GG | CG | AG | GT | CT | CC | CC |
| ASC969 | Control | AG | CG | AG | GT | CT | CC | CC |
| ASC970 | Control | GG | CC | GG | GG | CC | CC | CC |
| ASC972 | Control | AG | CC | GG | GG | CC | CC | CC |
| ASC984 | Control | GG | GG | AA | TT | TT | CC | CC |
| ASC988 | Control | GG | GG | AA | GT | TT | CC | CC |
| ASC989 | Control | GG | CC | GG | GG | CC | CC | CC |
| ASC992 | Control | GG | CC | GG | GG | CC | CC | CC |
| ASC995 | Control | GG | CC | GG | GG | CC | TT | CT |
| ASC996 | Control | GG | CC | AG | GG | CT | CC | CC |
| PA008  | Control | GG | CG | AA | GT | TT | CC | CC |
| PA009  | Control | GG | CG | AG | GT | CT | CC | CC |
| PA010  | Control | AG | GG | AA | GT | TT | CC | CC |
| PA015  | Control | GG | CC | GG | GG | CC | CC | CC |
| PA016  | Control | GG | CG | AG | GT | CT | CC | CC |

Online supplement to: Developing a Risk-scoring model for Ankylosing Spondylitis Based on a Combination of HLA-B27, Single-nucleotide Polymorphism, and Copy Number Variant Markers. *The Journal of Rheumatology*. doi:10.3899/jrheum.160347

|       |         |    |    |    |    |    |    |    |
|-------|---------|----|----|----|----|----|----|----|
| PA017 | Control | GG | CG | AG | GT | CT | CC | CC |
| PA019 | Control | AG | GG | AA | TT | TT | CC | CC |
| PA022 | Control | AG | GG | AA | TT | TT | CC | CC |
| PA025 | Control | GG | CG | AG | GT | CT | CC | CC |
| PA026 | Control | GG | CC | GG | GG | CC | CC | CC |
| PA027 | Control | AG | CG | AG | GT | CT | CC | CC |
| PA028 | Control | GG | CC | GG | GG | CC | CC | CC |
| PA031 | Control | AG | CG | AA | GG | TT | CC | CC |
| PA033 | Control | GG | GG | AA | GT | TT | CC | CC |
| PA034 | Control | AG | CG | AG | GT | CT | CC | CC |
| PA035 | Control | GG | CC | GG | GG | CC | CC | CC |
| PA037 | Control | GG | CG | AG | GT | CT | CC | CC |
| PA040 | Control | AG | CC | GG | GG | CC | CC | CC |
| PA041 | Control | GG | CC | GG | GG | CC | CC | CC |
| PA043 | Control | AG | CG | AG | GT | CT | CC | CC |
| PA045 | Control | GG | GG | AA | GT | TT | CC | CC |
| PA081 | Control | AG | CG | AA | GT | TT | CC | CC |
| PA082 | Control | AA | GG | AA | TT | TT | CC | CC |
| PA084 | Control | GG | CG | AG | GT | CT | CC | CC |
| PA086 | Control | GG | CG | AG | GT | CT | TT | CT |
| PA087 | Control | GG | GG | AA | TT | TT | CC | CC |
| PA089 | Control | AA | GG | AA | TT | TT | CC | CC |
| PA090 | Control | AG | CG | AG | GT | CT | CC | CC |
| PA091 | Control | GG | CG | AG | GT | CT | CC | CC |
| PA094 | Control | GG | CG | AG | GT | CT | CC | CC |
| PA095 | Control | GG | CC | GG | GG | CC | CC | CC |
| PA096 | Control | GG | CC | GG | GG | CC | TT | CT |
| PA097 | Control | AA | CC | GG | GG | CC | CC | CC |
| PA100 | Control | AG | CG | AG | GT | CT | CC | CC |
| PA101 | Control | AA | CG | AG | GT | CT | CC | CC |
| PA104 | Control | AG | CC | GG | GG | CC | CC | CC |
| PA108 | Control | GG | GG | AA | GT | TT | CC | CC |
| PA109 | Control | GG | CG | AG | GT | CT | CC | CC |
| PA111 | Control | GG | GG | AA | TT | TT | CC | CC |
| PA113 | Control | AG | CG | AG | TT | CT | CC | CC |
| PA114 | Control | GG | CG | AG | GT | CT | CC | CC |
| PA115 | Control | AG | CG | AG | GT | CT | CC | CC |
| PA116 | Control | GG | CC | GG | GG | CC | CC | CC |
| PA118 | Control | GG | CG | AG | GT | CT | CC | CC |
| PA119 | Control | AA | CC | GG | GG | CC | CC | CC |
| PA125 | Control | GG | GG | AA | TT | TT | CC | CC |
| PA128 | Control | AA | CG | AG | GT | CT | CC | CC |
| PA142 | Control | GG | CG | AG | GG | CT | CC | CC |
| PA472 | Control | GG | GG | AA | GT | TT | CC | CC |
| PA480 | Control | AG | CG | AG | GT | CT | CC | CC |
| PA482 | Control | AA | CG | AG | GT | CT | CC | CC |
| PA484 | Control | AG | CG | AG | GT | CT | CC | CC |
| PA485 | Control | GG | GG | AA | GT | TT | CC | CC |
| PA486 | Control | GG | GG | AA | GT | TT | CC | CC |
| PA490 | Control | AG | CG | AG | GT | CT | CC | CC |
| PA492 | Control | AA | CG | AG | GT | CT | CC | CC |
| PA494 | Control | AG | CG | AG | GT | CT | CC | CC |
| PA495 | Control | GG | GG | AA | TT | TT | CC | CC |
| PA497 | Control | GG | CC | AG | GG | CT | CC | CC |
| PA498 | Control | AG | CC | GG | GG | CC | CC | CC |
| RC121 | Control | GG | GG | AA | TT | TT | CC | CC |
| RC126 | Control | GG | CG | AG | GT | CT | CC | CC |
| RC130 | Control | AG | GG | AA | GT | TT | CC | CC |
| RC134 | Control | AG | CC | GG | GG | CC | CC | CC |
| RC160 | Control | AG | CC | GG | GG | CC | CC | CC |
| RC167 | Control | AG | CC | GG | GG | CC | CC | CC |
| RC181 | Control | AG | GG | AA | GT | TT | CC | CC |

Online supplement to: Developing a Risk-scoring model for Ankylosing Spondylitis Based on a Combination of HLA-B27, Single-nucleotide Polymorphism, and Copy Number Variant Markers. *The Journal of Rheumatology*. doi:10.3899/jrheum.160347

|        |         |    |    |    |    |    |    |    |
|--------|---------|----|----|----|----|----|----|----|
| RC186  | Control | AG | GG | AA | GT | TT | CC | CC |
| RC200  | Control | GG | CG | AG | GT | CT | CC | CC |
| RC208  | Control | AG | CC | AG | GG | CT | CC | CC |
| RC258  | Control | GG | CG | AG | GT | CT | CC | CC |
| RC259  | Control | AG | CG | AG | GT | CT | CT | CT |
| RC262  | Control | AG | GG | AA | GT | TT | CC | CC |
| RC265  | Control | GG | CG | AG | GT | CT | CC | CC |
| RC273  | Control | AG | CG | AG | GT | CT | CC | CC |
| RC298  | Control | AG | CC | GG | GG | CC | CC | CC |
| RC300  | Control | GG | CC | GG | GG | CC | CC | CC |
| RC317  | Control | GG | CC | GG | GG | CC | CC | CC |
| RC336  | Control | GG | CC | GG | GG | CC | CC | CC |
| RC337  | Control | GG | CG | AG | GT | CT | CC | CC |
| RC338  | Control | AG | CG | AG | GT | CT | CC | CC |
| RC373  | Control | GG | GG | AA | GT | TT | CC | CC |
| RC385  | Control | GG | CC | GG | GG | CC | CC | CC |
| RC412  | Control | GG | CC | GG | GG | CC | CT | CT |
| RC450  | Control | GG | CG | AG | GT | CT | CC | CC |
| RC466  | Control | AG | CC | GG | GG | CC | CC | CC |
| RC529  | Control | GG | CG | AG | GG | CT | CC | CC |
| RC534  | Control | GG | CG | AG | GT | CT | CC | CC |
| RC567  | Control | AG | CG | AG | GT | CT | CC | CC |
| RC588  | Control | GG | CC | AG | GG | CT | CC | CC |
| RC606  | Control | GG | CC | GG | GG | CC | CC | CC |
| RC611  | Control | GG | GG | AA | GT | TT | CC | CC |
| RC699  | Control | AG | CC | GG | GG | CC | CC | CC |
| SLE234 | Control | GG | GG | AA | TT | TT | CC | CC |
| SLE235 | Control | GG | CC | GG | GG | CC | CC | CC |
| SLE240 | Control | AG | CG | AG | GT | CT | CC | CC |
| SLE241 | Control | AG | CC | GG | GG | CC | CC | CC |
| SLE243 | Control | AA | CC | GG | GG | CC | CT | CT |

**Supplementary Data 5.** Associations of seven SNPs in the AS-GRS construction set and independent validation set.

| SNP        | Minor allele | Major allele | Model*    | AS-GRS construction set       |                                  |                       | Independent validation set    |                                  |                      |
|------------|--------------|--------------|-----------|-------------------------------|----------------------------------|-----------------------|-------------------------------|----------------------------------|----------------------|
|            |              |              |           | Genotypes or alleles in cases | Genotypes or alleles in controls | P-value               | Genotypes or alleles in cases | Genotypes or alleles in controls | P-value              |
| rs10865331 | A            | G            | Dominant  | 222/63                        | 182/181                          | 4.1x10 <sup>-13</sup> | 402/173                       | 388/290                          | 3.5x10 <sup>-6</sup> |
|            |              |              | Recessive | 59/226                        | 31/332                           | 1.1x10 <sup>-5</sup>  | 79/496                        | 90/588                           | 0.868                |
|            |              |              | Genotypic | 59/163/63                     | 31/151/181                       | 1.3x10 <sup>-13</sup> | 79/323/173                    | 90/298/290                       | 9.4x10 <sup>-6</sup> |
|            |              |              | Allelic   | 281/289                       | 213/513                          | 3.1x10 <sup>-13</sup> | 481/669                       | 478/878                          | 0.001                |
| rs27044    | G            | C            | Dominant  | 204/81                        | 246/117                          | 0.304                 | -                             | -                                | -                    |
|            |              |              | Recessive | 61/224                        | 85/278                           | 0.571                 | -                             | -                                | -                    |
|            |              |              | Genotypic | 61/143/81                     | 85/161/117                       | 0.334                 | -                             | -                                | -                    |
|            |              |              | Allelic   | 265/305                       | 331/395                          | 0.779                 | -                             | -                                | -                    |
| rs27434    | A            | G            | Dominant  | 208/77                        | 258/105                          | 0.599                 | -                             | -                                | -                    |
|            |              |              | Recessive | 68/217                        | 95/268                           | 0.524                 | -                             | -                                | -                    |
|            |              |              | Genotypic | 68/140/77                     | 95/163/105                       | 0.560                 | -                             | -                                | -                    |
|            |              |              | Allelic   | 276/294                       | 353/373                          | 0.955                 | -                             | -                                | -                    |
| rs27037    | T            | G            | Dominant  | 149/136                       | 236/127                          | 0.001                 | -                             | -                                | -                    |
|            |              |              | Recessive | 29/256                        | 45/318                           | 0.387                 | -                             | -                                | -                    |
|            |              |              | Genotypic | 29/120/136                    | 45/191/127                       | 0.005                 | -                             | -                                | -                    |
|            |              |              | Allelic   | 178/392                       | 281/445                          | 0.006                 | -                             | -                                | -                    |
| rs30187    | T            | C            | Dominant  | 208/77                        | 259/104                          | 0.660                 | -                             | -                                | -                    |
|            |              |              | Recessive | 68/217                        | 94/269                           | 0.584                 | -                             | -                                | -                    |
|            |              |              | Genotypic | 68/140/77                     | 94/165/104                       | 0.659                 | -                             | -                                | -                    |
|            |              |              | Allelic   | 276/294                       | 353/373                          | 0.955                 | -                             | -                                | -                    |
| rs17482078 | T            | C            | Dominant  | 22/263                        | 24/339                           | 0.645                 | -                             | -                                | -                    |
|            |              |              | Recessive | 8/277                         | 7/356                            | 0.600                 | -                             | -                                | -                    |

Online supplement to: Developing a Risk-scoring model for Ankylosing Spondylitis Based on a Combination of HLA-B27, Single-nucleotide Polymorphism, and Copy Number Variant Markers. *The Journal of Rheumatology*. doi:10.3899/jrheum.160347

|            |   |   |           |          |          |       |   |   |   |
|------------|---|---|-----------|----------|----------|-------|---|---|---|
|            |   |   | Genotypic | 8/14/263 | 7/17/339 | 0.784 | - | - | - |
|            |   |   | Allelic   | 30/540   | 31/695   | 0.429 | - | - | - |
| rs10050860 | T | C | Dominant  | 22/263   | 24/339   | 0.645 | - | - | - |
|            |   |   | Recessive | 0/285    | 1/362    | 1.000 | - | - | - |
|            |   |   | Genotypic | 0/22/263 | 1/23/339 | 0.740 | - | - | - |
|            |   |   | Allelic   | 22/548   | 25/701   | 0.765 | - | - | - |

\* Dominant: (DD, Dd) vs. dd, Recessive: DD vs. (Dd, dd), Genotypic: DD vs. Dd vs. dd, Allelic: D vs. d; D is the minor allele and d is the major allele

**Supplementary Data 6.** Associations of genetic factors in the AS-GRS model.

| Genetic marker   | Gene           | AS-GRS construction set |                        | Independent validation set |                        |
|------------------|----------------|-------------------------|------------------------|----------------------------|------------------------|
|                  |                | OR (95% CI)             | <i>P</i>               | OR (95% CI)                | <i>P</i>               |
| HLA-B27 positive | HLA-B27        | 273.07 (121.38-614.35)  | 6.91x10 <sup>-42</sup> | 164.81 (101.46-267.70)     | 1.64x10 <sup>-94</sup> |
| 1q32.2 deletion  | <i>HHAT</i>    | 6.01 (2.76-13.05)       | 6.00x10 <sup>-6</sup>  | 2.02 (1.30-3.14)           | 0.002                  |
| 13q13.1 deletion | <i>EEF1DP3</i> | 5.08 (2.34-11.02)       | 3.92x10 <sup>-5</sup>  | 2.73 (1.74-4.30)           | 1.43x10 <sup>-5</sup>  |
| 16p13.3 deletion | -              | 4.04 (1.15-14.14)       | 0.029                  | 4.60 (1.92-11.03)          | 0.001                  |
| rs10865331 (A)   | -              | 4.04 (1.86-8.77)        | 4.16x10 <sup>-4</sup>  | 3.45 (2.15-5.56)           | 3.38x10 <sup>-7</sup>  |

Logistic regression analysis for CNVs, SNP, and HLA-B27 factor.

95% CI = 95% confidence interval

**Supplementary Data 7.** Histograms by AS-GRS value in the AS-GRS construction set and independent validation set.

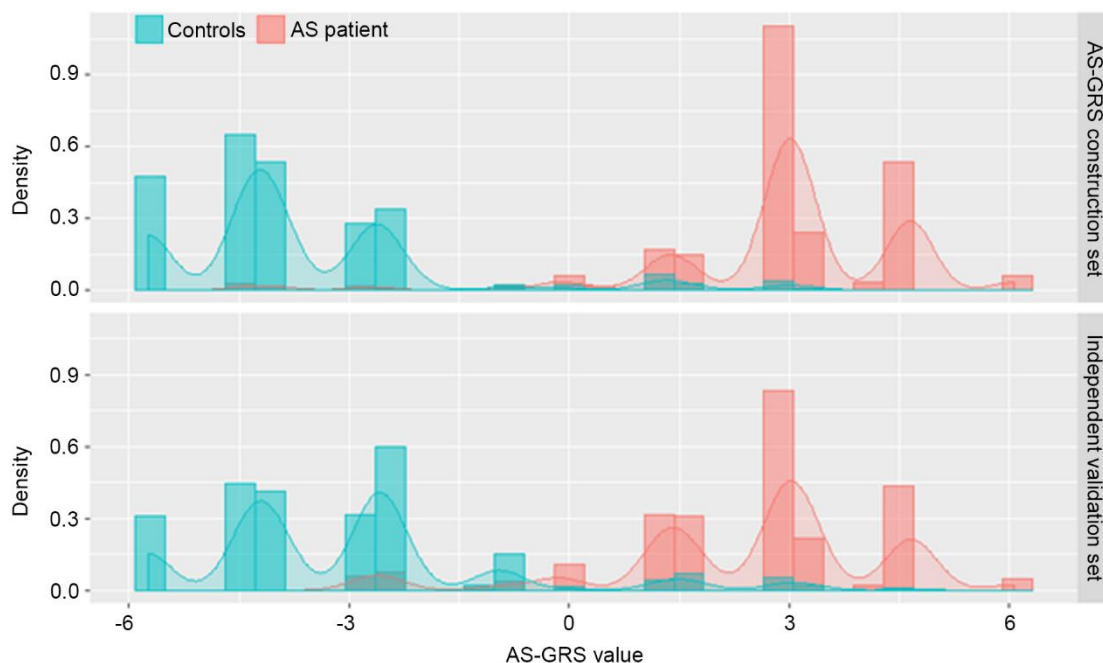

**Supplementary Data 8.** ROC curves for the AS-GRS and HLA-B27 models in HLA-B27 positive individuals. A, red and blue lines represent the AS-GRS and HLA-B27 based prediction models, respectively. B, sensitivity, specificity and accuracy of the AS-GRS model at specified thresholds.

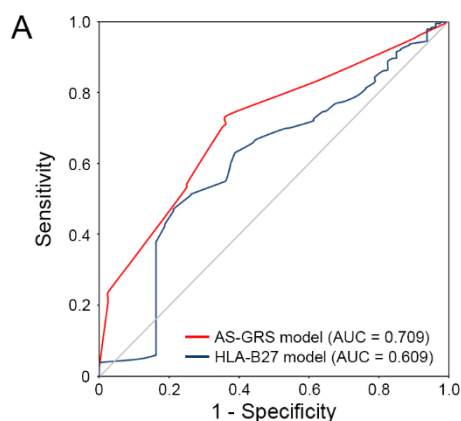

**B**

| Sensitivity (%) | Specificity (%) | Accuracy (%) | Threshold |
|-----------------|-----------------|--------------|-----------|
| 100.0           | 0               | 91.0         | -1.14     |
| 96.0            | 8.8             | 88.2         | 0.56      |
| 84.4            | 35.0            | 80.0         | 1.37      |
| 80.1            | 46.3            | 77.0         | 1.57      |
| 73.4            | 63.8            | 72.5         | 2.16      |
| 54.2            | 75.0            | 56.1         | 3.00      |
| 33.4            | 90.0            | 38.5         | 3.17      |
| 20.8            | 97.5            | 27.7         | 4.68      |
| 0               | 100.0           | 9.0          | 7.07      |



Online supplement to: Developing a Risk-scoring model for Ankylosing Spondylitis Based on a Combination of HLA-B27, Single-nucleotide Polymorphism, and Copy Number Variant Markers. *The Journal of Rheumatology*. doi:10.3899/jrheum.160347

**Supplementary Data 9.** Winner's curse effects.

| Marker     | MAF   | A1       | P-value               | Unadjusted odds ratio | Bias-corrected odds ratio (95% CI) |
|------------|-------|----------|-----------------------|-----------------------|------------------------------------|
| 1q32.2     | 0.171 | Deletion | $1.3 \times 10^{-15}$ | 2.87                  | 2.90 (2.10-4.62)                   |
| 13q13.1    | 0.131 | Deletion | $1.3 \times 10^{-16}$ | 3.13                  | 2.78 (1.94-4.86)                   |
| 16p13.3    | 0.025 | Deletion | $2.2 \times 10^{-4}$  | 2.77                  | 2.72 (1.19-29.28)                  |
| rs10865331 | 0.293 | A        | $9.7 \times 10^{-14}$ | 2.34                  | 2.55 (1.83-4.27)                   |

Winner's curse effects were estimated using 'BR-squared' software (Hum Genet 2011; 129:545-552). 95% CI = 95% confidence interval
